# Supplementary material for: Gcn5p-dependent acetylation induces degradation of the meiotic transcriptional repressor Ume6p
Source: PubMed Central journal article supplement — Mol Biol Cell. 2012 May 1;23(9):1609–17. doi: 10.1091/mbc.E11-06-0536 (PMC3338428; doi:10.1091/mbc.e11-06-0536), 2012-05-01
Supplement: supp_E11-06-0536_CombinedSupMats.pdf [file supp_E11-06-0536_CombinedSupMats.pdf]

**A**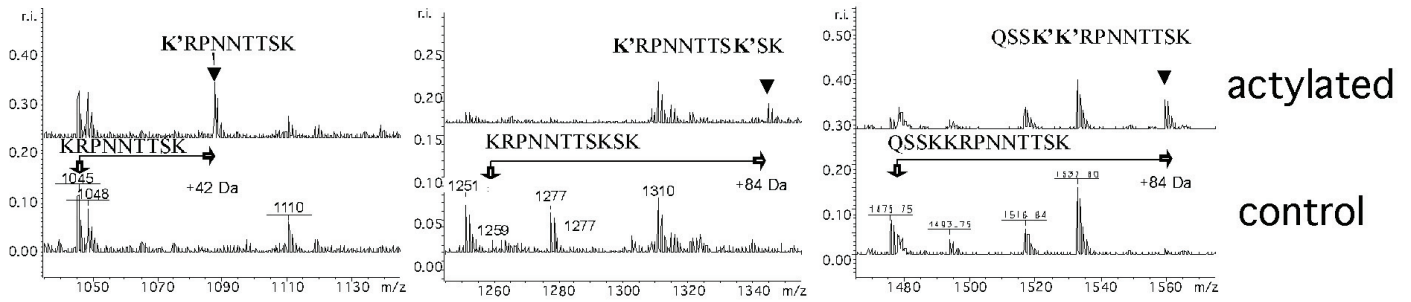**B**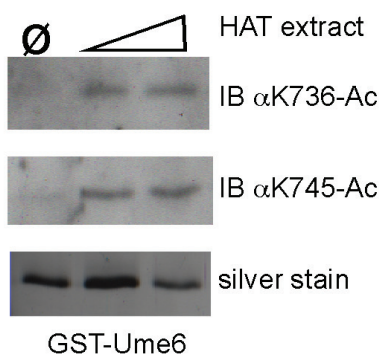**C**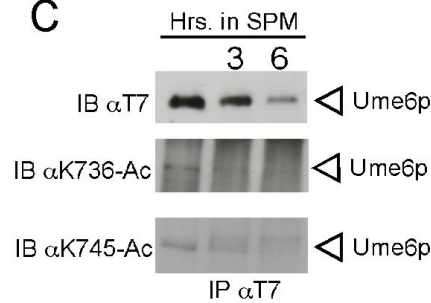

**Supplemental Figure 1.** Identification of in vitro Ume6p acetylation sites. **(A)** Reactions as described in Figure 1A were examined by a Bruker Reflex IV MALDI-TOF mass spectrometer following separation by a Waters 2690 HPLC system. Three representative spectra from acetylated and control samples are depicted. The corresponding peptide sequences with (K') and without (K) acetylation are indicated. **(B)** An in vitro acetylated Gst-Ume6 reaction with increasing amount of extract (2 or 4  $\mu$ l) as described in Materials and methods was split into thirds and separated by PAGE. The gels were blotted and probed with either the  $\alpha$ K736-Ac or  $\alpha$ K745-Ac antibodies. No HAT extract control ( $\emptyset$ ) was also included. **(C)** Wild type strain expressing T7-Ume6p was grown to mid-log phase in acetate medium (0 hr) then transferred to sporulation medium (SPM) for 3 or 6 hrs. Extracts prepared from these samples were immunoprecipitated with T7 Mab and the immunoprecipitates blotted and probed with either the T7 Mab,  $\alpha$ K736-Ac or  $\alpha$ K745-Ac.

| Strain <sup>a</sup> | Genotype <sup>b</sup>                                              | Source                         |
|---------------------|--------------------------------------------------------------------|--------------------------------|
| RSY10               | <i>MATa ade2 ade6 can1-100 his3-11,15 leu2-3,112 trp1-1 ura3-1</i> | (Strich <i>et al.</i> , 1989)  |
| RSY335*             | <i>MATa/MATα</i>                                                   | (Cooper <i>et al.</i> , 1997)  |
| RSY1079*            | <i>MATa/MATα T7-UME6</i>                                           | (Mallory <i>et al.</i> , 2007) |
| RSY622*             | <i>MATa gcn5::TRP1</i>                                             | This study                     |
| RSY1634*            | <i>MATa/MATα gcn5::TRP1 T7-UME6<sup>KALLQ</sup></i>                | This study                     |
| RSY1091*            | <i>MATa/MATα gcn5::TRP1 T7-UME6</i>                                | This study                     |
| RSY1101*            | <i>MATa/MATα cdc20-1 T7-UME6</i>                                   | (Mallory <i>et al.</i> , 2007) |
| RSY1622*            | <i>MATa/MATα rpd3::TRP1 UME6<sup>KALLR</sup></i>                   | This study                     |
| RSY1623*            | <i>MATa/MATα cdc20-1 UME6<sup>KALLQ</sup></i>                      | This study                     |
| RSY1226*            | <i>MATa/MATα UME6<sup>KALLQ</sup></i>                              | This study                     |
| RSY1149*            | <i>MATa/MATα UME6<sup>KALLR</sup></i>                              | This study                     |
| RSY1148*            | <i>MATa/MATα UME6<sup>K745R</sup></i>                              | This study                     |
| RSY1147*            | <i>MATa/MATα UME6<sup>K736,737R</sup></i>                          | This study                     |
| RSY1632*            | <i>MATa/MATα rpd3::TRP1 T7-UME6</i>                                | This study                     |
| RSY1636*            | <i>MATa/MATα rpd3::TRP1 UME6<sup>KALLR</sup></i>                   | This study                     |
| RSY1125*            | <i>MATa/MATα UME6<sup>K745Q</sup></i>                              | This study                     |
| RSY1062*            | <i>MATa/MATα ume6::LEU2</i>                                        | This study                     |
| RSY1500             | <i>MATa/MATα ADA2-TAP:his3::LEU2</i>                               | This study                     |

**Supplemental Table 1. Yeast strains used in this study.** <sup>a</sup>Asterisk denotes strains also harboring *cyh2<sup>r</sup>-z ho::LYS2 leu2::hisG lys2 trp1::hisG ura3* alleles. <sup>b</sup>All alleles listed are homozygous unless indicated otherwise.

---

| Name              | Sequence (5'-3')                                                            |
|-------------------|-----------------------------------------------------------------------------|
| K736R             | TCAAAGGCGAAACAGTCATCACGTAAAAGACCAAATAATACTACT                               |
| K737R             | AAGGCGAAACAGTCATCAAAGAGAAGACCAAATAATACTACTTCG                               |
| K736R, K737R      | TCAAAGGCGAAACAGTCATCACGTAAAAGACCAAATAATACTACT                               |
| K745R             | AGACCAAATAATACTACTTCGCGATCAAAGCAAACAATTCTCAA                                |
| KALLR             | TCAAAGGCGAAACAGTCATCAAGAAGAAGACCAAATAATACTACTT<br>CGAGATCAAAGCAAACAATTCTCAA |
| KALLQ             | TCAAAGGCGAAACAGTCATCACAACAAAGACCAAATAATACTACTT<br>CGCAATCAAAGCAAACAATTCTCAA |
| <i>SPO13</i> qPCR | AAGCCCACATCCAGGATTAATT, CGAACATCTCCAGCCTTTGAG                               |
| <i>UME6</i> qPCR  | CGGCAGTCCATCTAACGACTCT, CACGCCACGGCACAT                                     |
| <i>ENO1</i> qPCR  | GCCGCTGCTGAAAAGAATGT, TGGAGAGGTCTTGGACTTAGACAA                              |

---

**Supplemental Table 2.** Oligonucleotides used for site directed mutagenesis and qPCR as indicated.
